# Supplementary material for: Harnessing citizen science for marine conservation in Malta: a comparative analysis of GAM and MaxEnt models in bottlenose dolphin habitat mapping
Source: PeerJ. 2025 Aug 5;13:e19804. doi: 10.7717/peerj.19804 (PMC12333609; doi:10.7717/peerj.19804)
Supplement: Supplemental Information 2 [file peerj-13-19804-s002.xlsx]

## Sheet: COASTWISE_All_Sightings
Latitude	Longitude	Species
35.964	14.4073	Tursiops Truncatus
35.965	14.4049	Tursiops Truncatus
35.9648	14.4053	Tursiops Truncatus
36.0071	14.4343	Tursiops Truncatus
35.9649	14.4057	Tursiops Truncatus
35.979	14.3697	Tursiops Truncatus
35.9651	14.4062	Tursiops Truncatus
35.962	14.4059	Tursiops Truncatus
35.9649	14.4054	Tursiops Truncatus
35.9694	14.4097	Tursiops Truncatus
36.0144	14.3813	Tursiops Truncatus
36.0162	14.446	Tursiops Truncatus
35.9806	14.3732	Tursiops Truncatus
36.0754	14.2989	Tursiops Truncatus
35.9804	14.3718	Tursiops Truncatus
35.9807	14.3727	Tursiops Truncatus
35.9651	14.4064	Tursiops Truncatus
35.9814	14.3716	Tursiops Truncatus
35.9807	14.3726	Tursiops Truncatus
36.0031	14.4114	Tursiops Truncatus
35.9646	14.4035	Tursiops Truncatus
35.9807	14.3726	Tursiops Truncatus
35.9893	14.3272	Tursiops Truncatus
36.0829	14.2371	Tursiops Truncatus
36.0188	14.3159	Tursiops Truncatus
35.9891	14.326	Tursiops Truncatus
35.9784	14.3656	Tursiops Truncatus
35.9586	14.454	Tursiops Truncatus
36.002	14.3622	Tursiops Truncatus
35.963	14.4086	Tursiops Truncatus
36.0159	14.3495	Tursiops Truncatus
35.9486	14.4669	Tursiops Truncatus
35.9947	14.3416	Tursiops Truncatus
35.9634	14.424	Tursiops Truncatus
36.0223	14.3491	Tursiops Truncatus
35.9899	14.3273	Tursiops Truncatus
35.9667	14.4242	Tursiops Truncatus
35.9756	14.4358	Tursiops Truncatus
36.0585	14.3276	Tursiops Truncatus
36.003	14.3574	Tursiops Truncatus
35.9753	14.3872	Tursiops Truncatus
35.9797	14.3709	Tursiops Truncatus
35.9564	14.3968	Tursiops Truncatus
35.9808	14.3709	Tursiops Truncatus
35.9813	14.3737	Tursiops Truncatus
35.962	14.4209	Tursiops Truncatus
35.9976	14.3427	Tursiops Truncatus
35.9727	14.4235	Tursiops Truncatus
35.9631	14.4219	Tursiops Truncatus
35.962	14.4055	Tursiops Truncatus
36.0027	14.4237	Tursiops Truncatus
36.0024	14.3344	Tursiops Truncatus
35.9308	14.499	Tursiops Truncatus
36.0014	14.4107	Tursiops Truncatus
36.0459	14.3711	Tursiops Truncatus
36.0061	14.3202	Tursiops Truncatus
35.9989	14.4252	Tursiops Truncatus
35.9652	14.4071	Tursiops Truncatus
36.0137	14.4338	Tursiops Truncatus
35.9814	14.3724	Tursiops Truncatus
35.9863	14.4091	Tursiops Truncatus
35.9691	14.4238	Tursiops Truncatus
35.9668	14.3527	Tursiops Truncatus
35.96	14.41	Tursiops Truncatus
35.9609	14.4042	Tursiops Truncatus
35.9629	14.405	Tursiops Truncatus
35.9814	14.3709	Tursiops Truncatus
35.9637	14.4197	Tursiops Truncatus
36.1277	14.2775	Delphinus delphis
36.0074	14.2952	Tursiops Truncatus
36.005	14.3039	Tursiops Truncatus
